# Supplementary material for: Influence of reaction temperature and stoichiometry on the coordination mode of a multidentate pyridylpyrazole ligand in Co(ii) complexes: from a 0D mononuclear structure to 3D frameworks
Source: Royal Society of Chemistry journal article supplement (doi:10.1039/d2ce00468b), 2022-01-01
Supplement: d2ce00468b1.pdf [file d2ce00468b1.pdf]

## *Supporting Information*

### **Influence of reaction temperature and stoichiometry on the coordination mode of a multidentate pyridylpyrazole ligand in Co(II) complexes: from 0D mononuclear to 3D frameworks**

Ling-Mei Zhang,<sup>a</sup> Chao Feng,<sup>b</sup> Yu-Meng Yang,<sup>a</sup> Huan-Huan Huang,<sup>a</sup> Guo-Ning Zhang,<sup>c</sup> Yu-Cheng Wang<sup>c</sup> and Hong Zhao<sup>\*a</sup>

<sup>a</sup> School of Chemistry and Chemical Engineering, Southeast University, Nanjing 211189, PR China.

<sup>b</sup> School of Materials and Chemical Engineering, Bengbu University, Bengbu 233030, PR China.

<sup>c</sup> Institute of Medicinal Biotechnology, Chinese Academy of Medical Science and Peking Union Medical College, Beijing 100050, PR China.

\*e-mail: [zhaohong@seu.edu.cn](mailto:zhaohong@seu.edu.cn)

**Table S1** Selected bond lengths (Å) and angles (°) for complexes **1–3**.

**Table S2** Hydrogen bond parameters for complexes **1–3**.

**Fig. S1** <sup>1</sup>H NMR (400 MHz, DMSO-d<sub>6</sub>) spectrum of H<sub>2</sub>ppza.

**Fig. S2** IR spectra of H<sub>2</sub>ppza ligand and complexes **1–3** from 400 cm<sup>-1</sup> to 4000 cm<sup>-1</sup>.

**Fig. S3** Asymmetric unit of **1–3**, drawn with displacement ellipsoids at 30% probability level.

**Fig. S4** PXRD patterns of simulated and experimental crystals of complexes **1–3**.

**Fig. S5** (a) UV-Vis absorption spectra and (b) luminescence spectra of 10<sup>-5</sup> M DMSO solutions of H<sub>2</sub>ppza and its corresponding complexes **1–3**.

**Fig. S6** ECL intensity–time profile of blank electrode.

**Fig. S7** Electrochemiluminescence for Ru(bpy)<sub>3</sub><sup>2+</sup>.

**Table S1a.** Selected bond lengths (Å) and angles (°) for complex **1**.

| <b>1</b>                             |            |                                      |            |
|--------------------------------------|------------|--------------------------------------|------------|
| Co1–O1                               | 2.0966(13) | Co1–O3                               | 2.1164(14) |
| Co1–N                                | 2.1119(14) | Co1–O1 <sup>a</sup>                  | 2.0966(13) |
| Co1–O3 <sup>a</sup>                  | 2.1164(14) | Co1–N1 <sup>a</sup>                  | 2.1119(14) |
| O1–Co1–O3                            | 172.46(5)  | O1–Co1–N1                            | 77.99(5)   |
| O1–Co1–O1 <sup>a</sup>               | 94.74(5)   | O1–Co1–O3 <sup>a</sup>               | 89.35(5)   |
| O1–Co1–N1 <sup>a</sup>               | 96.72(5)   | O3–Co1–N1                            | 95.27(5)   |
| O1 <sup>a</sup> –Co1–O3              | 89.35(5)   | O3–Co1–O3 <sup>a</sup>               | 87.32(5)   |
| O3–Co1–N1 <sup>a</sup>               | 90.32(5)   | O1 <sup>a</sup> –Co1–N1              | 96.72(5)   |
| O3 <sup>a</sup> –Co1–N1              | 90.32(5)   | N1–Co1–N1 <sup>a</sup>               | 172.29(6)  |
| O1 <sup>a</sup> –Co1–O3 <sup>a</sup> | 172.46(5)  | O1 <sup>a</sup> –Co1–N1 <sup>a</sup> | 77.99(5)   |
| O3 <sup>a</sup> –Co1–N1 <sup>a</sup> | 95.27(5)   |                                      |            |

Symmetry code: a = 1–x, y, 1/2–z

**Table S1b.** Selected bond lengths (Å) and angles (°) for complex **2**.

| <b>2</b>                             |            |                                      |            |
|--------------------------------------|------------|--------------------------------------|------------|
| Co1–O2                               | 2.0656(12) | Co1–N1                               | 2.2226(14) |
| Co1–O2 <sup>a</sup>                  | 2.0656(12) | Co1–N1 <sup>a</sup>                  | 2.2226(14) |
| Co1–N3 <sup>b</sup>                  | 2.1411(16) | Co1–N3 <sup>c</sup>                  | 2.1411(16) |
| O2–Co1–N1                            | 76.50(5)   | O2–Co1–O2 <sup>a</sup>               | 166.15(5)  |
| O2–Co1–N1 <sup>a</sup>               | 93.23(5)   | O2–Co1–N3 <sup>b</sup>               | 87.90(6)   |
| O2–Co1–N3 <sup>c</sup>               | 101.94(6)  | O2 <sup>a</sup> –Co1–N1              | 93.23(5)   |
| N1–Co1–N1 <sup>a</sup>               | 85.51(5)   | N1–Co1–N3 <sup>b</sup>               | 164.34(5)  |
| N1–Co1–N3 <sup>c</sup>               | 94.21(5)   | O2 <sup>a</sup> –Co1–N1 <sup>a</sup> | 76.50(5)   |
| O2 <sup>a</sup> –Co1–N3 <sup>b</sup> | 101.94(6)  | O2 <sup>a</sup> –Co1–N3 <sup>c</sup> | 87.90(6)   |
| N1 <sup>a</sup> –Co1–N3 <sup>b</sup> | 94.21(5)   | N1 <sup>a</sup> –Co1–N3 <sup>c</sup> | 164.34(5)  |
| N3 <sup>b</sup> –Co1–N3 <sup>c</sup> | 90.23(6)   |                                      |            |

Symmetry code: a = –x, y, 1/2–z; b = –1/2+x, 1/2+y, z; c = 1/2–x, 1/2+y, 1/2–z

**Table S1c.** Selected bond lengths (Å) and angles (°) for complex **3**.

| <b>3</b>                             |            |                         |            |
|--------------------------------------|------------|-------------------------|------------|
| Co1–Cl1                              | 2.4576(13) | Co1–O2                  | 2.085(3)   |
| Co1–O3                               | 2.157(3)   | Co1–N1                  | 2.171(3)   |
| Co1–N3 <sup>a</sup>                  | 2.153(3)   | Co1–O1 <sup>b</sup>     | 2.027(3)   |
| Cl1–Co1–O2                           | 87.16(9)   | Cl1–Co1–O3              | 175.61(10) |
| Cl1–Co1–N1                           | 91.11(11)  | Cl1–Co1–N3 <sup>a</sup> | 92.20(10)  |
| Cl1–Co1–O1 <sup>b</sup>              | 93.83(8)   | O2–Co1–O3               | 88.57(13)  |
| O2–Co1–N1                            | 77.86(12)  | O2–Co1–N3 <sup>a</sup>  | 88.83(12)  |
| O1 <sup>b</sup> –Co1–O2              | 176.96(11) | O3–Co1–N1               | 86.99(14)  |
| O3–Co1–N3 <sup>a</sup>               | 88.73(13)  | O1 <sup>b</sup> –Co1–O3 | 90.48(12)  |
| N1–Co1–N3 <sup>a</sup>               | 166.10(13) | O1 <sup>b</sup> –Co1–N1 | 104.97(13) |
| O1 <sup>b</sup> –Co1–N3 <sup>a</sup> | 88.27(12)  |                         |            |

Symmetry code: a = 1/2+x, -1/2+y, z; b = -1/2+x, 3/2-y, -1/2+z

**Table S2** Hydrogen bond parameters for complexes **1–3**.

| D–H...A                  | D–H (Å) | H...A (Å) | D...A (Å)  | D–H...A (°) |
|--------------------------|---------|-----------|------------|-------------|
| <b>1</b>                 |         |           |            |             |
| N2–H2...O2 <sup>a</sup>  | 0.8600  | 1.8500    | 2.697(2)   | 167.00      |
| O3–H3A...N3 <sup>b</sup> | 0.8200  | 2.0100    | 2.804(2)   | 164.00      |
| O3–H3B...O1 <sup>a</sup> | 0.8400  | 2.3700    | 3.0556(19) | 139.00      |
| O3–H3B...O2 <sup>a</sup> | 0.8400  | 2.2300    | 3.043(2)   | 162.00      |
| C9–H9...O2 <sup>a</sup>  | 0.9300  | 2.5300    | 3.427(3)   | 162.00      |

Symmetry code: a = 1/2+x, 1/2+y, z; b = x, 1-y, 1/2+z

**2**

|                         |        |        |          |        |
|-------------------------|--------|--------|----------|--------|
| N2-H2...O1 <sup>a</sup> | 0.8600 | 1.9300 | 2.687(2) | 145.00 |
| C7-H7...O2 <sup>b</sup> | 0.9300 | 2.3700 | 2.904(3) | 116.00 |
| C9-H9...O2 <sup>a</sup> | 0.9300 | 2.5700 | 3.454(2) | 158.00 |

Symmetry code: a = 1/2+x, 1/2-y, 1/2+z; b = 1/2+x, -1/2+y, z

### 3

|                           |        |        |          |        |
|---------------------------|--------|--------|----------|--------|
| N2-H2A...C11 <sup>a</sup> | 0.8600 | 2.8000 | 3.638(4) | 166.00 |
| N2-H2A...O2 <sup>a</sup>  | 0.8600 | 2.4700 | 2.978(4) | 118.00 |
| O3-H3A...C11 <sup>b</sup> | 0.8000 | 2.4900 | 3.267(4) | 165.00 |
| O3-H3B...C11 <sup>c</sup> | 0.6800 | 2.7100 | 3.287(4) | 145.00 |
| C7-H7...O2 <sup>d</sup>   | 0.9300 | 2.4600 | 2.981(5) | 115.00 |
| C9-H9...C11 <sup>a</sup>  | 0.9300 | 2.8000 | 3.691(4) | 161.00 |

Symmetry code: a = -1/2+x, 3/2-y, -1/2+z; b = 1/2+x, 3/2-y, -1/2+z; c = x, y, -1+z; d = -1/2+x, 1/2+y, z

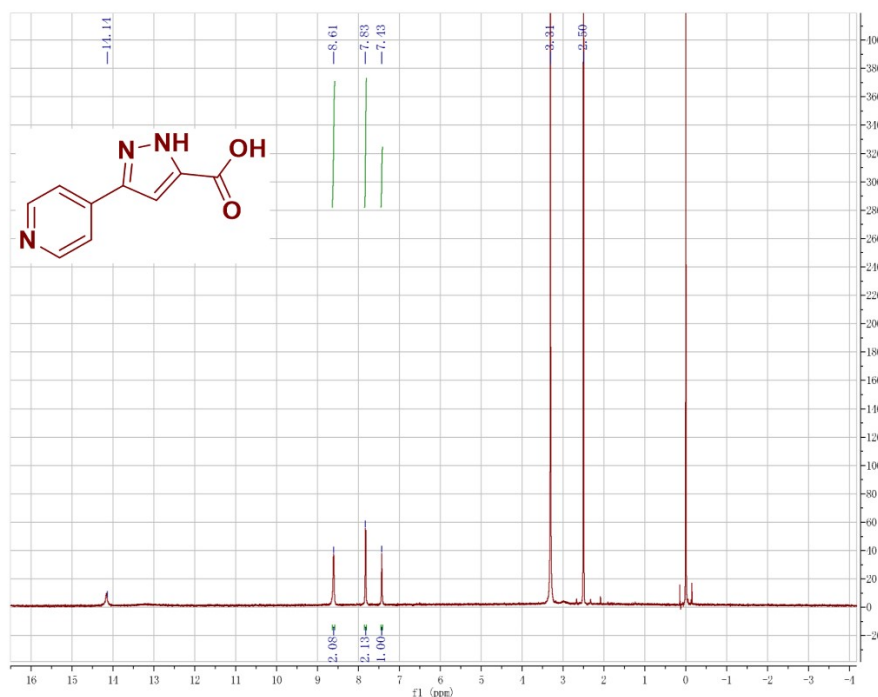

**Fig. S1** <sup>1</sup>H NMR (400 MHz, DMSO-d<sub>6</sub>) spectrum of H<sub>2</sub>ppza.

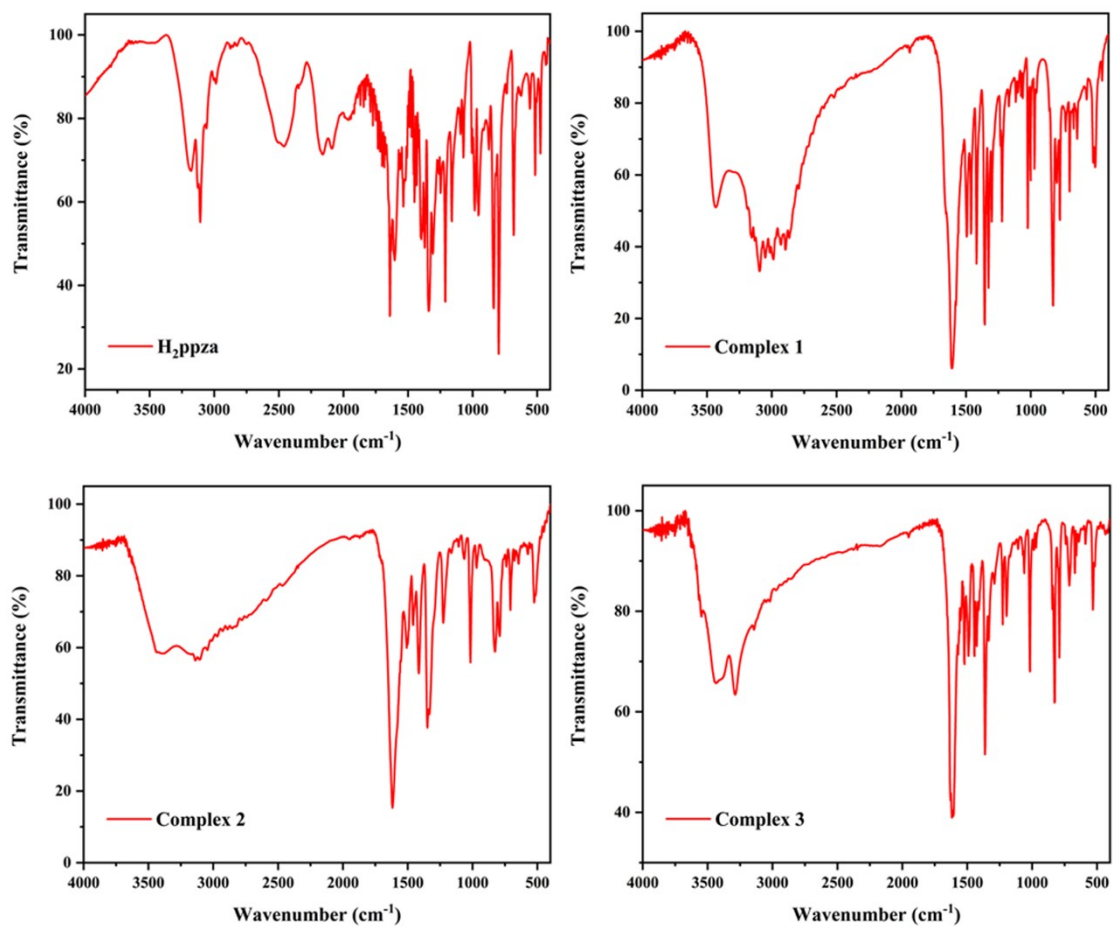

**Fig. S2 IR spectra of H<sub>2</sub>ppza ligand and complexes 1–3 from 400 cm<sup>-1</sup> to 4000 cm<sup>-1</sup>.**

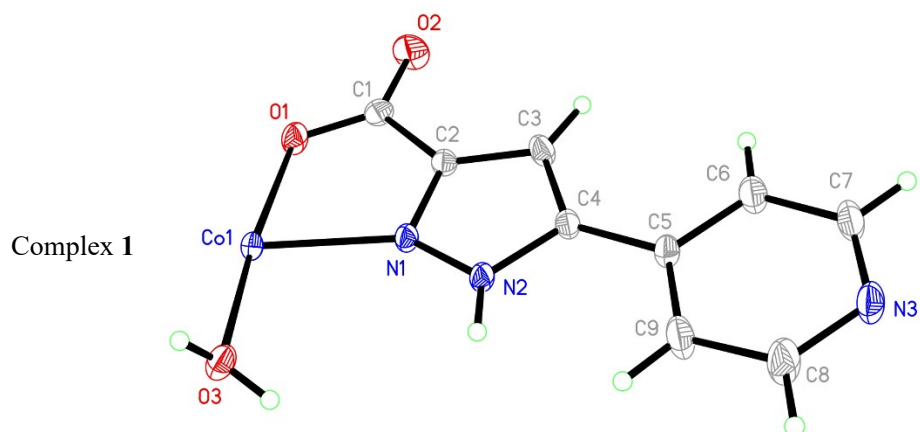

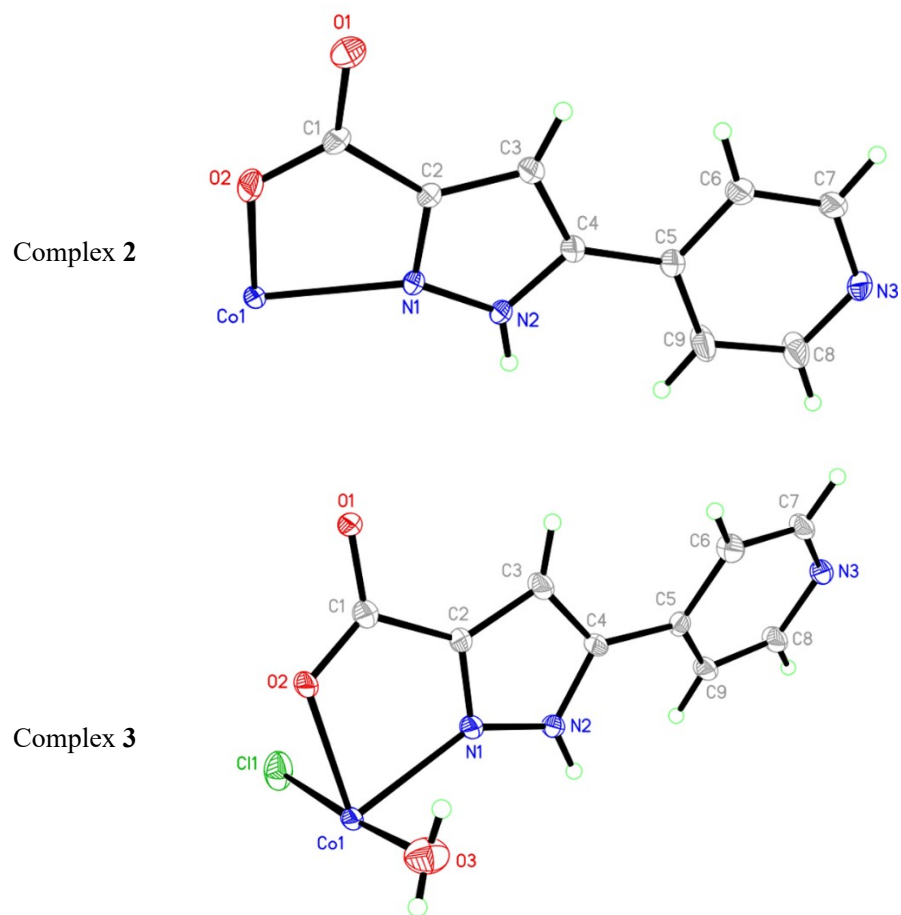

**Fig. S3** Asymmetric unit of 1–3, drawn with displacement ellipsoids at 30% probability level.

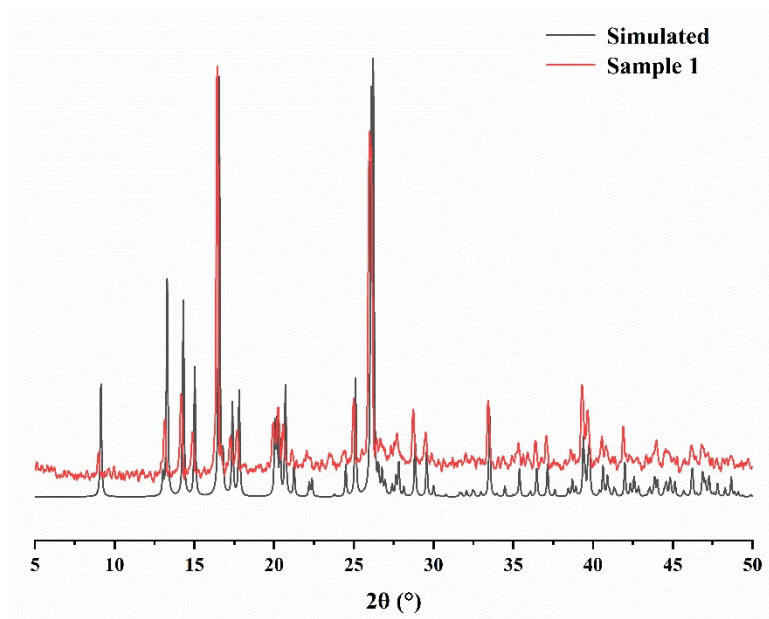

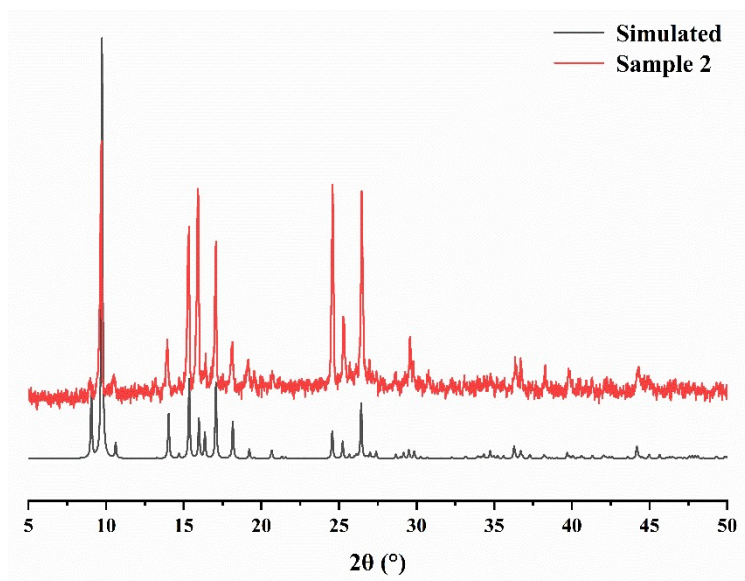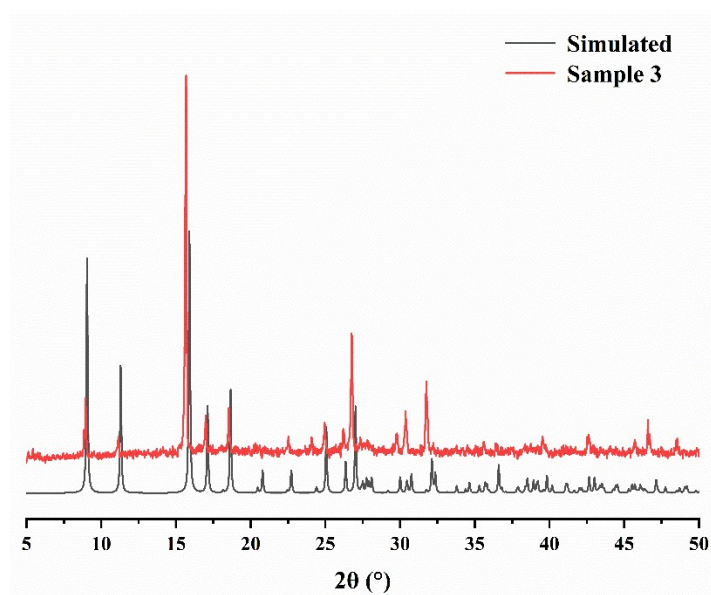

**Fig. S4** PXRD patterns of simulated and experimental crystals of complexes 1–3.

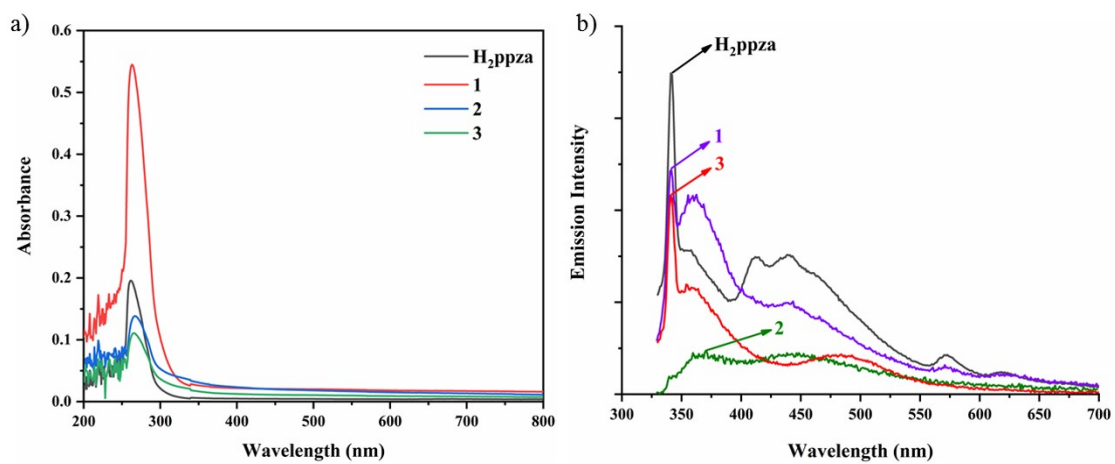

**Fig. S5** (a) UV-Vis absorption spectra and (b) luminescence spectra of  $10^{-5}$  M DMSO solutions of  $H_2ppza$  and its corresponding complexes **1–3**.

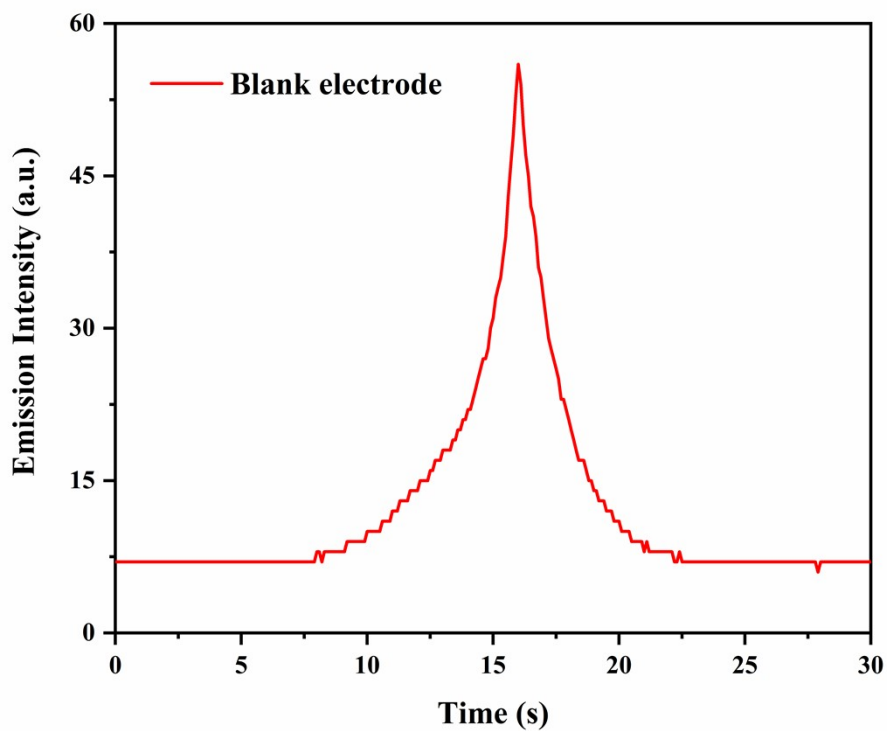

**Fig. S6** ECL intensity–time profile of blank electrode.

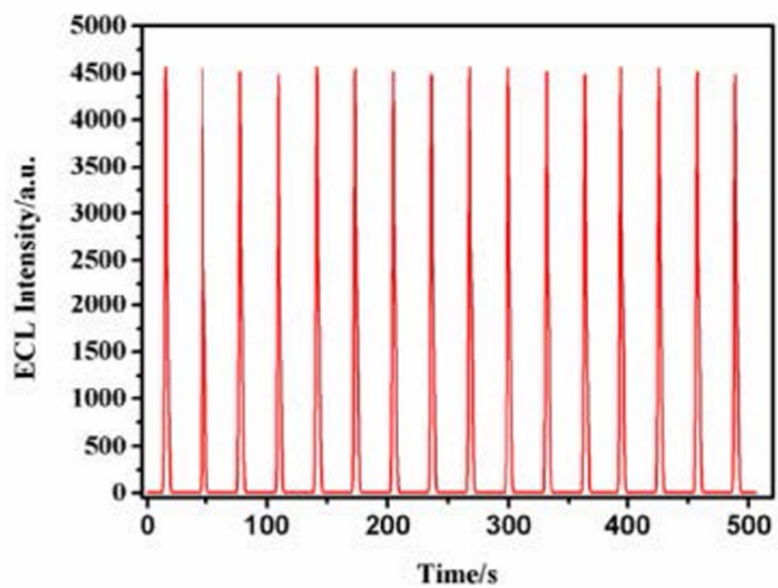

**Fig. S7** Electrochemiluminescence for  $Ru(bpy)_3^{2+}$ .
